# Supplementary material
Source: publisher site journal article supplement (https://www.kjim.org/upload/media/kjim-2020-390-suppl3.pdf)
Supplement: Supplementary file 1 [file kjim-2020-390-suppl3.pdf]

**Supplementary Table 3. Antihypertensive medication and SARS-CoV-2 susceptibility in propensity score matched patients with hypertension**

|                         | Patients on medication | Control          | Adjusted OR (95% CI) | p value |
|-------------------------|------------------------|------------------|----------------------|---------|
| RAS blocker             | 547/20,178 (2.7)       | 472/20,178 (2.3) | 1.16 (1.03–1.32)     | 0.017   |
| Calcium-channel blocker | 598/22,560 (2.7)       | 605/22,560 (2.7) | 0.99 (0.88–1.11)     | 0.823   |
| Beta-blocker            | 243/11,770 (2.1)       | 271/11,770 (2.3) | 0.89 (0.75–1.07)     | 0.212   |
| Diuretics               | 281/9,342 (3.0)        | 252/9,342 (2.7)  | 1.12 (0.94–1.33)     | 0.215   |

Values are presented as SARS-CoV-2 (+)/total no. (%). Hypertensive patients on RAS blockers showed higher SARS-CoV-2 positive rate than subjects without RAS blockers after matching for propensity score. Patients were propensity score matched for age, sex, heart failure, diabetes, history of myocardial infarction, asthma or chronic obstructive pulmonary disease, and other classes of medication.

SARS-CoV-2, severe acute respiratory syndrome coronavirus 2; OR, odds ratio; CI, confidence interval; RAS, renin-angiotensin system.
